# Supplementary material
Source: publisher site journal article supplement (http://www.degruyter.com/publication/journal_key/HELIA/downloadAsset/HELIA_Harvard%20Reference%20Style.pdf)
Supplement: Supplementary file 1 [file HELIA_Harvard%20Reference%20Style.pdf]

## Harvard

### In-text citation

#### Direct citation

##### **Single author**

Paccagnella (2015)

##### **Two authors**

Borgonovi and Burns (2015)

##### **More than two authors**

Martin et al. (2014)

##### **Series of references**

Zabal et al. (2014) and Mohadjer et al. (2013a)

##### **Same author group with different years**

Smith et al. (1985, 1986)

##### **Same author group with same year**

Lawrence and David (2009a,b)

##### **Author (with same surname and different initials) with same year**

T.H.E. Smith et al. (2003) and A. Smith et al. (2003)

#### Indirect citation

##### **Single author**

(Paccagnella 2015)

##### **Two authors**

(Borgonovi and Burns 2015)

##### **More than two authors**

(Martin et al. 2014)

##### **Series of references**

Alphabetical order:

(Mohadjer et al. 2013a; Zabal et al. 2014).

##### **Same author group with different years**

(Smith et al., 1985, 1986)

##### **Same author group with same years**

(Lawrence and David 2009a,b)

##### **Author (with same surname and different initials) with same year**

Alphabetical order:

(A. Smith et al. 2003; T.H.E. Smith et al. 2003)

### Reference list

**Issue number** Not allowed

**Author initials** Abbreviated with dot and unspaced

**Reference list label/order** Alphabetical order

**Punctuation b/w journal title and volume** Only space

### **Journal**

Melitz, Marc J. (2003). The impact of trade on intra-industry reallocations and aggregate industry productivity. *Econometrica* 71: 1695–1725.

### **Journal with supplement/article number**

Yuan, M. and Liu, H. (2011). The economic consequences of fair value accounting. *Account. Econ. Law*. 1(Suppl. 2): 1–42.

### **et al. usage**

More than ten authors followed by et al.:

Kaye, K., Day, R.D., Hair, E.C., Moore, K.A., Hadley, A.M., Teixeira, P.J., Helmschrott, S., Massing, N., Ackermann, D., Yuan, M., et al. (2009). Parent marital quality and the parent-adolescent relationship: effects on sexual activity among adolescents and youth. *Marriage & Fam. Rev.* 45: 270–288.

### **Epub ahead of print (DOI)**

Mason, E.B., Burkhart, K., and Lazebnik, R. (2018). Adolescent stress management in a primary care clinic. *Journal of Pediatric Health Care*, <https://doi.org/10.1016/j.pedhc.2018.08.001> (Epub ahead of print).

### **Journal – in press/forthcoming**

Tappy, L. and Lara, K.A. (in press). Metabolic effects of fructose and the worldwide increase in obesity. *Physiol. Rev.*

### **Book/monograph**

Andreasen, N.C. (2001). *Brave new brain: conquering mental illness in the era of the genome*. Oxford University Press, Oxford.

### **Book with edition**

Hicks, J.R. (1946). *Value and capital*, 2nd ed. Oxford: Clarendon.

### **Edited book**

Hertel, T.W. (Ed.) (1997). *Global trade analysis: modeling and applications*. Western Sydney University, Penrith.

### **Edited book with chapter title (and editors)**

Ferres, K. (2001). Idiot box: television, urban myths and ethical scenarios. In: Craven, I. (Ed.). *Australian cinema in the 1990s*. Frank Cass, London, pp. 175–188.

### **Book series**

Langacker, R.W. (2004). Possession, location, and existence. In: Augusto S. and Gonçalves, M. (Eds.), *Linguagem, cultura e cognição: Estudos de linguística cognitiva*, Vol. I. Almedina, Coimbra, pp. 85–120.

### **Proceedings/Conferences**

Chang, S.S., Liaw, L., and Ruppenhofer, J. (Eds.) (2000). *Proceedings of the twenty-fifth annual meeting of the Berkeley Linguistics Society, February 12-15, 1999: general session and parasession on loan word phenomena*. Berkeley Linguistics Soc., Berkeley.

### **Electronic publications with DOI**

Cooper, D. (2009). Native ant may stop toad in its tracks. ABC Science, Available at: <https://www.abc.net.au/science/articles/2009/03/31/2530686.htm>.

**Electronic publications without DOI**

For all documents on the web that do not have a DOI, a URL and access date must be provided.

Este, J., Warren, C., Connor, L., Brown, M., Pollard, R., and O'Connor, T. (2008). Life in the clickstream: the future of journalism. Media Entertainment and Arts Alliance, Available at:

[https://www.academia.edu/17148635/Life\\_in\\_the\\_Clickstream\\_the\\_Future\\_of\\_Journalism](https://www.academia.edu/17148635/Life_in_the_Clickstream_the_Future_of_Journalism). (Accessed 27 May 2009).

**Thesis/Dissertation**

Fayadh, K.H. (2015). *The legal regulation of assisted reproductive technology in Iraq: lessons from the Australian approach*, Ph.D. thesis. Penrith, Western Sydney University.

**Report**

Pataki, Z. (2014). The cost of non-Europe in the single market. Technical Report 9051, European Parliamentary Research Service.

**Patent**

Smith, P.S. (2002). A pump for use in windmill assembly, application no. 2008230011.

**Standards**

Standards Australia (1989). *Electrical equipment for coal mines – insulating materials – materials for insulating power conducting components* (AS 1147.1-1989).

**Corporate publication**

Institute of Chartered Accountants in Australia (2004). *AASB standards for 2005: equivalents to IFRSs as at August 2004*, Person Education, Sydney, Australia.
